# Supplementary material for: Genomic insights into the origin of farming in the ancient Near East
Source: Springer Nature journal article supplement (doi:10.1038/nature19310), 2016-07-25
Supplement: nature19310-s3.xlsx [file nature19310-s3.xlsx]

## Sheet: Sheet1
Fst computed on the HO dataset
Fst below and its standard error above the diagonal
Values above 0.02, 0.04, and 0.06 are highlighted in color
	Abkhasian	Adygei	Albanian	Anatolia_N	Armenia_ChL	Armenia_EBA	Armenia_MLBA	Armenian	Assyrian	Balkar	Basque	BedouinA	BedouinB	Belarusian	Bulgarian	Canary_Islander	Chechen	CHG	Croatian	Cypriot	Czech	Druze	EHG	English	Estonian	Europe_EN	Europe_LNBA	Europe_MNChL	Finnish	French	Georgian	German	Greek	Hungarian	Icelandic	Iran_ChL	Iranian	Iran_N	Irish	Irish_Ulster	Italian_North	Italian_South	Jew_Ashkenazi	Jew_Georgian	Jew_Iranian	Jew_iraqi	Jew_Libyan	Jew_Moroccan	Jew_Tunisian
Abkhasian		0	0.001	0.001	0.001	0.001	0.001	0	0	0	0	0	0.001	0	0	0.001	0	0.002	0	0	0	0	0.002	0	0.001	0	0	0.001	0.001	0	0	0	0	0	0.001	0.001	0	0.003	0	0.001	0	0.001	0.001	0.001	0	0.001	0.001	0.001	0.001
Adygei	0.003		0	0	0.001	0.001	0.001	0	0	0	0	0	0	0	0	0.001	0	0.002	0	0	0	0	0.002	0	0	0	0	0	0.001	0	0	0	0	0	0	0.001	0	0.003	0	0.001	0	0.001	0	0	0	0.001	0	0.001	0.001
Albanian	0.008	0.008		0.001	0.001	0.001	0.001	0	0.001	0.001	0	0	0.001	0.001	0	0.001	0.001	0.002	0.001	0.001	0.001	0	0.002	0.001	0.001	0	0	0.001	0.001	0	0.001	0.001	0	0	0.001	0.001	0	0.003	0	0.001	0	0.001	0.001	0.001	0.001	0.001	0.001	0.001	0.001
Anatolia_N	0.028	0.029	0.017		0.001	0.001	0.001	0	0	0.001	0	0	0.001	0.001	0	0.001	0.001	0.002	0	0	0.001	0	0.002	0.001	0.001	0	0	0	0.001	0	0.001	0.001	0	0	0.001	0.001	0	0.003	0	0.001	0	0.001	0.001	0.001	0.001	0.001	0.001	0.001	0.001
Armenia_ChL	0.018	0.018	0.017	0.026		0.002	0.002	0.001	0.001	0.001	0.001	0.001	0.001	0.001	0.001	0.002	0.001	0.003	0.001	0.001	0.001	0.001	0.003	0.001	0.001	0.001	0.001	0.001	0.001	0.001	0.001	0.001	0.001	0.001	0.001	0.002	0.001	0.004	0.001	0.001	0.001	0.001	0.001	0.001	0.001	0.001	0.001	0.001	0.001
Armenia_EBA	0.007	0.008	0.011	0.022	0.012		0.002	0.001	0.001	0.001	0.001	0.001	0.001	0.001	0.001	0.002	0.001	0.003	0.001	0.001	0.001	0.001	0.003	0.001	0.001	0.001	0.001	0.001	0.001	0.001	0.001	0.001	0.001	0.001	0.001	0.002	0.001	0.004	0.001	0.001	0.001	0.001	0.001	0.001	0.001	0.001	0.001	0.001	0.001
Armenia_MLBA	0.003	0.005	0.007	0.023	0.015	0.002		0.001	0.001	0.001	0.001	0.001	0.001	0.001	0.001	0.002	0.001	0.003	0.001	0.001	0.001	0.001	0.003	0.001	0.001	0.001	0.001	0.001	0.001	0.001	0.001	0.001	0.001	0.001	0.001	0.002	0.001	0.004	0.001	0.001	0.001	0.001	0.001	0.001	0.001	0.001	0.001	0.001	0.001
Armenian	0.004	0.005	0.005	0.021	0.015	0.007	0.003		0	0	0	0	0.001	0	0	0.001	0	0.002	0	0	0	0	0.002	0	0.001	0	0	0	0.001	0	0	0	0	0	0	0.001	0	0.003	0	0.001	0	0.001	0	0	0	0.001	0	0.001	0.001
Assyrian	0.007	0.008	0.008	0.023	0.018	0.008	0.006	0.003		0	0	0	0	0.001	0	0.001	0	0.002	0	0	0	0	0.002	0	0.001	0	0	0	0.001	0	0	0	0	0	0.001	0.001	0	0.003	0	0.001	0	0.001	0	0.001	0	0.001	0	0.001	0.001
Balkar	0.003	0.003	0.007	0.029	0.018	0.008	0.005	0.005	0.008		0	0	0.001	0	0	0.001	0	0.002	0	0	0	0	0.002	0	0	0	0	0.001	0.001	0	0	0	0	0	0	0.001	0	0.003	0	0.001	0	0.001	0.001	0.001	0	0.001	0	0.001	0.001
Basque	0.02	0.018	0.01	0.026	0.028	0.024	0.018	0.017	0.02	0.018		0	0.001	0	0	0.001	0	0.002	0	0	0	0	0.002	0	0	0	0	0	0	0	0	0	0	0	0	0.001	0	0.003	0	0	0	0.001	0	0.001	0	0.001	0	0.001	0.001
BedouinA	0.012	0.013	0.01	0.023	0.022	0.014	0.01	0.006	0.008	0.012	0.021		0	0	0	0.001	0	0.002	0	0	0	0	0.002	0	0	0	0	0	0.001	0	0	0	0	0	0	0.001	0	0.003	0	0.001	0	0.001	0	0	0	0	0	0	0
BedouinB	0.032	0.033	0.03	0.04	0.042	0.033	0.03	0.025	0.027	0.033	0.041	0.018		0.001	0.001	0.001	0.001	0.002	0.001	0.001	0.001	0	0.002	0.001	0.001	0.001	0	0.001	0.001	0	0.001	0.001	0	0	0.001	0.001	0	0.003	0.001	0.001	0	0.001	0.001	0.001	0.001	0.001	0.001	0.001	0.001
Belarusian	0.016	0.013	0.006	0.03	0.025	0.02	0.012	0.015	0.018	0.012	0.012	0.02	0.041		0	0.001	0	0.002	0	0.001	0	0	0.002	0	0	0	0	0	0.001	0	0	0	0	0	0	0.001	0	0.003	0	0.001	0	0.001	0.001	0.001	0.001	0.001	0.001	0.001	0.001
Bulgarian	0.008	0.008	0	0.018	0.017	0.012	0.005	0.006	0.009	0.007	0.009	0.011	0.031	0.004		0.001	0	0.002	0	0	0	0	0.002	0	0	0	0	0	0.001	0	0	0	0	0	0	0.001	0	0.003	0	0	0	0.001	0	0.001	0	0.001	0	0.001	0.001
Canary_Islander	0.01	0.009	0.001	0.017	0.019	0.014	0.008	0.006	0.009	0.009	0.005	0.008	0.028	0.006	0.001		0.001	0.003	0.001	0.001	0.001	0.001	0.003	0.001	0.001	0.001	0.001	0.001	0.002	0.001	0.001	0.001	0.001	0.001	0.001	0.002	0.001	0.003	0.001	0.002	0.001	0.002	0.001	0.001	0.001	0.002	0.001	0.002	0.001
Chechen	0.006	0.006	0.009	0.032	0.02	0.01	0.006	0.007	0.01	0.006	0.02	0.014	0.035	0.014	0.009	0.011		0.002	0	0.001	0	0	0.002	0	0.001	0.001	0	0.001	0.001	0	0	0.001	0	0	0	0.001	0	0.003	0	0.001	0	0.001	0.001	0.001	0.001	0.001	0.001	0.001	0.001
CHG	0.033	0.036	0.049	0.073	0.05	0.03	0.033	0.04	0.042	0.037	0.063	0.05	0.072	0.054	0.049	0.051	0.038		0.002	0.002	0.002	0.002	0.004	0.002	0.002	0.002	0.002	0.002	0.002	0.002	0.002	0.002	0.002	0.002	0.002	0.003	0.002	0.005	0.002	0.002	0.002	0.002	0.002	0.002	0.002	0.002	0.002	0.002	0.002
Croatian	0.012	0.01	0.002	0.023	0.02	0.015	0.007	0.01	0.013	0.01	0.01	0.015	0.035	0.003	0.001	0.003	0.011	0.05		0	0	0	0.002	0	0	0	0	0	0.001	0	0	0	0	0	0	0.001	0	0.003	0	0.001	0	0.001	0.001	0.001	0.001	0.001	0	0.001	0.001
Cypriot	0.007	0.008	0.004	0.016	0.018	0.01	0.006	0.002	0.005	0.008	0.015	0.006	0.025	0.014	0.005	0.005	0.01	0.047	0.009		0	0	0.002	0	0.001	0	0	0	0.001	0	0	0.001	0	0	0.001	0.001	0	0.003	0	0.001	0	0.001	0.001	0.001	0.001	0.001	0.001	0.001	0.001
Czech	0.013	0.01	0.003	0.026	0.022	0.017	0.01	0.012	0.015	0.01	0.009	0.017	0.038	0.001	0.002	0.004	0.012	0.053	0.001	0.011		0	0.002	0	0	0	0	0	0.001	0	0	0	0	0	0	0.001	0	0.003	0	0	0	0.001	0.001	0.001	0.001	0.001	0.001	0.001	0.001
Druze	0.011	0.012	0.009	0.023	0.022	0.013	0.01	0.006	0.009	0.012	0.021	0.009	0.026	0.02	0.01	0.01	0.014	0.05	0.014	0.007	0.016		0.002	0	0	0	0	0	0.001	0	0	0	0	0	0	0.001	0	0.003	0	0.001	0	0.001	0	0	0	0	0	0	0
EHG	0.069	0.06	0.059	0.089	0.064	0.068	0.055	0.07	0.072	0.059	0.062	0.073	0.095	0.044	0.054	0.058	0.059	0.098	0.052	0.07	0.046	0.075		0.002	0.002	0.002	0.002	0.002	0.002	0.002	0.002	0.002	0.002	0.002	0.002	0.003	0.002	0.005	0.002	0.002	0.002	0.002	0.002	0.002	0.002	0.002	0.002	0.002	0.002
English	0.014	0.011	0.005	0.026	0.022	0.018	0.011	0.012	0.015	0.01	0.008	0.017	0.038	0.004	0.003	0.002	0.012	0.053	0.003	0.011	0.001	0.016	0.048		0	0	0	0	0	0	0	0	0	0	0	0.001	0	0.003	0	0	0	0.001	0.001	0.001	0.001	0.001	0.001	0.001	0.001
Estonian	0.019	0.015	0.008	0.034	0.027	0.023	0.014	0.018	0.021	0.015	0.014	0.023	0.045	0.002	0.006	0.007	0.016	0.056	0.005	0.018	0.002	0.023	0.042	0.005		0.001	0	0	0	0	0.001	0	0	0	0	0.001	0	0.003	0	0.001	0	0.001	0.001	0.001	0.001	0.001	0.001	0.001	0.001
Europe_EN	0.025	0.026	0.012	0.004	0.026	0.021	0.022	0.019	0.022	0.025	0.02	0.021	0.039	0.025	0.015	0.011	0.029	0.072	0.018	0.015	0.02	0.021	0.083	0.02	0.028		0	0	0.001	0	0.001	0	0	0	0.001	0.001	0	0.003	0	0.001	0	0.001	0	0.001	0.001	0.001	0	0.001	0.001
Europe_LNBA	0.016	0.013	0.008	0.025	0.019	0.015	0.008	0.015	0.018	0.013	0.012	0.02	0.041	0.006	0.006	0.006	0.014	0.05	0.006	0.015	0.005	0.02	0.04	0.004	0.007	0.02		0	0	0	0	0	0	0	0	0.001	0	0.003	0	0	0	0.001	0	0.001	0	0.001	0	0.001	0.001
Europe_MNChL	0.027	0.026	0.012	0.012	0.029	0.025	0.022	0.021	0.024	0.026	0.014	0.023	0.042	0.02	0.013	0.008	0.029	0.071	0.015	0.017	0.017	0.024	0.075	0.015	0.023	0.006	0.016		0.001	0	0.001	0	0	0	0.001	0.001	0	0.003	0	0.001	0	0.001	0.001	0.001	0.001	0.001	0.001	0.001	0.001
Finnish	0.02	0.016	0.011	0.036	0.029	0.024	0.016	0.019	0.023	0.016	0.016	0.025	0.046	0.005	0.008	0.01	0.018	0.058	0.008	0.02	0.006	0.025	0.043	0.007	0.003	0.03	0.008	0.025		0	0.001	0.001	0	0	0	0.001	0	0.003	0	0.001	0	0.001	0.001	0.001	0.001	0.001	0.001	0.001	0.001
French	0.012	0.01	0.003	0.022	0.021	0.016	0.009	0.01	0.013	0.01	0.006	0.015	0.035	0.004	0.002	0.001	0.011	0.053	0.002	0.009	0.001	0.014	0.05	0.001	0.005	0.016	0.004	0.013	0.007		0	0	0	0	0	0.001	0	0.003	0	0	0	0.001	0	0	0	0	0	0	0
Georgian	0.001	0.004	0.008	0.027	0.019	0.008	0.005	0.003	0.007	0.004	0.021	0.012	0.032	0.017	0.009	0.011	0.007	0.033	0.012	0.007	0.014	0.011	0.07	0.014	0.02	0.025	0.017	0.027	0.022	0.013		0	0	0	0	0.001	0	0.003	0	0.001	0	0.001	0.001	0.001	0	0.001	0	0.001	0.001
German	0.013	0.01	0.003	0.025	0.022	0.017	0.009	0.011	0.014	0.01	0.008	0.017	0.037	0.002	0.002	0.003	0.012	0.052	0.002	0.011	0	0.016	0.048	0.001	0.003	0.02	0.004	0.016	0.006	0.001	0.014		0	0	0	0.001	0	0.003	0	0.001	0	0.001	0.001	0.001	0.001	0.001	0.001	0.001	0.001
Greek	0.007	0.007	0	0.016	0.017	0.01	0.006	0.004	0.007	0.007	0.01	0.009	0.028	0.007	0	0.001	0.009	0.049	0.003	0.003	0.004	0.009	0.06	0.005	0.009	0.013	0.008	0.013	0.012	0.004	0.008	0.004		0	0	0.001	0	0.003	0	0	0	0.001	0	0	0	0	0	0	0
Hungarian	0.012	0.009	0.003	0.024	0.021	0.016	0.008	0.01	0.013	0.01	0.009	0.015	0.036	0.002	0.001	0.002	0.011	0.052	0.002	0.009	0	0.015	0.048	0.001	0.003	0.018	0.005	0.015	0.006	0.001	0.013	0	0.003		0	0.001	0	0.003	0	0	0	0.001	0	0	0	0.001	0	0	0
Icelandic	0.016	0.013	0.007	0.03	0.026	0.021	0.012	0.015	0.018	0.013	0.011	0.021	0.041	0.005	0.006	0.006	0.014	0.056	0.006	0.015	0.003	0.02	0.047	0.002	0.006	0.024	0.006	0.019	0.008	0.003	0.017	0.003	0.008	0.004		0.001	0	0.003	0	0	0	0.001	0.001	0.001	0.001	0.001	0.001	0.001	0.001
Iran_ChL	0.011	0.014	0.018	0.027	0.017	0.006	0.007	0.008	0.01	0.014	0.032	0.015	0.035	0.027	0.018	0.02	0.016	0.037	0.023	0.012	0.025	0.016	0.078	0.026	0.031	0.028	0.023	0.031	0.032	0.023	0.012	0.025	0.016	0.023	0.029		0.001	0.004	0.001	0.001	0.001	0.001	0.001	0.001	0.001	0.001	0.001	0.001	0.001
Iranian	0.005	0.005	0.007	0.027	0.017	0.007	0.003	0.002	0.004	0.005	0.02	0.008	0.027	0.015	0.008	0.009	0.007	0.038	0.011	0.005	0.012	0.008	0.063	0.013	0.018	0.026	0.015	0.026	0.019	0.011	0.005	0.012	0.006	0.011	0.016	0.007		0.002	0	0	0	0.001	0	0	0	0	0	0	0
Iran_N	0.042	0.041	0.053	0.071	0.046	0.034	0.036	0.04	0.041	0.041	0.067	0.045	0.068	0.059	0.051	0.052	0.043	0.054	0.057	0.046	0.058	0.047	0.098	0.058	0.062	0.071	0.054	0.07	0.063	0.058	0.041	0.058	0.05	0.056	0.061	0.021	0.029		0.003	0.003	0.003	0.003	0.003	0.003	0.003	0.003	0.003	0.003	0.003
Irish	0.015	0.012	0.006	0.028	0.023	0.018	0.01	0.013	0.016	0.011	0.009	0.019	0.04	0.004	0.004	0.003	0.013	0.053	0.004	0.012	0.002	0.018	0.047	0.001	0.005	0.022	0.004	0.017	0.008	0.001	0.016	0.002	0.006	0.003	0.003	0.027	0.014	0.059		0	0	0.001	0	0.001	0.001	0.001	0	0.001	0.001
Irish_Ulster	0.015	0.011	0.006	0.028	0.025	0.018	0.011	0.013	0.016	0.012	0.009	0.018	0.04	0.005	0.005	0.004	0.012	0.053	0.004	0.013	0.002	0.019	0.046	0.001	0.004	0.022	0.004	0.018	0.007	0.001	0.016	0.002	0.007	0.002	0.003	0.027	0.014	0.058	0		0	0.001	0.001	0.001	0.001	0.001	0.001	0.001	0.001
Italian_North	0.01	0.009	0.001	0.016	0.019	0.013	0.008	0.006	0.009	0.008	0.008	0.011	0.031	0.007	0.002	0.001	0.011	0.051	0.003	0.004	0.004	0.011	0.059	0.003	0.009	0.012	0.007	0.011	0.011	0.002	0.009	0.003	0.002	0.003	0.006	0.019	0.009	0.055	0.005	0.005		0.001	0	0	0	0	0	0	0
Italian_South	0.022	0.022	0.018	0.03	0.031	0.023	0.02	0.017	0.021	0.021	0.025	0.021	0.041	0.024	0.016	0.016	0.023	0.064	0.02	0.017	0.021	0.022	0.078	0.02	0.027	0.027	0.025	0.028	0.029	0.019	0.021	0.021	0.016	0.019	0.024	0.029	0.02	0.064	0.022	0.023	0.016		0.001	0.001	0.001	0.001	0.001	0.001	0.001
Jew_Ashkenazi	0.012	0.01	0.007	0.02	0.022	0.014	0.009	0.007	0.01	0.011	0.015	0.01	0.029	0.013	0.006	0.006	0.012	0.051	0.009	0.006	0.01	0.011	0.067	0.009	0.015	0.018	0.014	0.017	0.017	0.008	0.012	0.01	0.006	0.009	0.013	0.017	0.009	0.05	0.011	0.011	0.006	0.02		0.001	0.001	0.001	0.001	0.001	0.001
Jew_Georgian	0.01	0.011	0.011	0.028	0.023	0.013	0.01	0.007	0.009	0.011	0.023	0.012	0.03	0.02	0.012	0.012	0.013	0.048	0.016	0.009	0.017	0.012	0.074	0.017	0.024	0.026	0.02	0.028	0.026	0.016	0.01	0.018	0.01	0.015	0.021	0.015	0.007	0.045	0.019	0.019	0.012	0.025	0.013		0.001	0.001	0.001	0.001	0.001
Jew_Iranian	0.011	0.012	0.011	0.026	0.022	0.013	0.009	0.006	0.008	0.012	0.023	0.01	0.028	0.021	0.012	0.012	0.014	0.048	0.015	0.008	0.018	0.011	0.075	0.018	0.024	0.025	0.021	0.027	0.026	0.016	0.011	0.018	0.01	0.016	0.022	0.013	0.007	0.043	0.02	0.02	0.012	0.024	0.012	0.01		0.001	0.001	0.001	0.001
Jew_iraqi	0.009	0.011	0.01	0.024	0.021	0.012	0.009	0.005	0.006	0.011	0.021	0.008	0.026	0.02	0.01	0.012	0.012	0.047	0.014	0.006	0.017	0.01	0.077	0.016	0.024	0.022	0.02	0.025	0.026	0.015	0.01	0.016	0.008	0.015	0.021	0.013	0.006	0.043	0.019	0.018	0.011	0.023	0.01	0.01	0.007		0.001	0.001	0.001
Jew_Libyan	0.016	0.017	0.012	0.024	0.025	0.019	0.015	0.011	0.013	0.016	0.022	0.011	0.03	0.021	0.013	0.011	0.019	0.057	0.017	0.01	0.018	0.014	0.077	0.018	0.025	0.022	0.022	0.023	0.027	0.016	0.016	0.018	0.011	0.016	0.021	0.022	0.014	0.055	0.02	0.02	0.012	0.025	0.013	0.017	0.015	0.014		0.001	0.001
Jew_Moroccan	0.012	0.013	0.007	0.02	0.022	0.014	0.011	0.007	0.01	0.012	0.017	0.008	0.028	0.016	0.009	0.006	0.014	0.053	0.012	0.006	0.013	0.011	0.071	0.013	0.02	0.018	0.017	0.019	0.02	0.011	0.012	0.013	0.007	0.012	0.017	0.017	0.01	0.051	0.015	0.014	0.008	0.021	0.009	0.012	0.012	0.011	0.011		0.001
Jew_Tunisian	0.015	0.016	0.011	0.022	0.024	0.017	0.014	0.01	0.011	0.016	0.021	0.01	0.028	0.02	0.012	0.009	0.017	0.057	0.015	0.009	0.017	0.013	0.077	0.017	0.024	0.02	0.021	0.022	0.025	0.015	0.015	0.017	0.01	0.015	0.02	0.02	0.012	0.054	0.019	0.019	0.01	0.024	0.011	0.016	0.013	0.012	0.002	0.01
Jew_Turkish	0.008	0.008	0.004	0.016	0.018	0.011	0.006	0.003	0.006	0.009	0.013	0.006	0.024	0.012	0.004	0.002	0.01	0.049	0.006	0.003	0.009	0.007	0.067	0.009	0.016	0.014	0.013	0.016	0.018	0.007	0.008	0.009	0.003	0.008	0.012	0.014	0.006	0.049	0.011	0.011	0.004	0.017	0.005	0.009	0.009	0.007	0.009	0.005	0.007
Jew_Yemenite	0.019	0.021	0.018	0.029	0.029	0.021	0.019	0.013	0.014	0.02	0.029	0.009	0.022	0.029	0.019	0.016	0.023	0.06	0.022	0.011	0.025	0.015	0.085	0.026	0.033	0.027	0.029	0.031	0.035	0.023	0.019	0.025	0.016	0.024	0.03	0.022	0.015	0.056	0.028	0.028	0.018	0.029	0.017	0.017	0.016	0.013	0.018	0.015	0.017
Jordanian	0.008	0.009	0.006	0.02	0.019	0.009	0.006	0.003	0.005	0.009	0.017	0.002	0.02	0.016	0.007	0.006	0.011	0.047	0.011	0.004	0.013	0.006	0.069	0.013	0.019	0.018	0.016	0.021	0.021	0.011	0.008	0.013	0.006	0.011	0.017	0.012	0.004	0.043	0.015	0.015	0.007	0.018	0.007	0.008	0.008	0.005	0.01	0.006	0.008
Kumyk	0.003	0.003	0.005	0.026	0.015	0.006	0.002	0.002	0.006	0.002	0.016	0.01	0.031	0.01	0.004	0.006	0.003	0.036	0.007	0.005	0.008	0.01	0.056	0.008	0.012	0.024	0.01	0.024	0.013	0.008	0.004	0.008	0.005	0.007	0.011	0.011	0.003	0.04	0.009	0.009	0.007	0.019	0.008	0.009	0.009	0.008	0.014	0.01	0.013
Lebanese	0.007	0.008	0.005	0.019	0.018	0.009	0.007	0.002	0.004	0.008	0.017	0.003	0.021	0.014	0.006	0.005	0.01	0.046	0.01	0.003	0.012	0.006	0.068	0.012	0.018	0.018	0.016	0.019	0.02	0.01	0.007	0.011	0.005	0.01	0.016	0.01	0.003	0.042	0.013	0.014	0.006	0.017	0.006	0.008	0.007	0.005	0.009	0.006	0.007
Lebanese_Christian	0.008	0.009	0.006	0.019	0.018	0.009	0.005	0.003	0.004	0.009	0.017	0.005	0.022	0.016	0.006	0.007	0.01	0.048	0.011	0.002	0.013	0.007	0.072	0.013	0.02	0.017	0.017	0.019	0.022	0.011	0.007	0.013	0.005	0.011	0.017	0.013	0.005	0.044	0.015	0.015	0.007	0.018	0.007	0.008	0.007	0.005	0.01	0.007	0.009
Lebanese_Muslim	0.006	0.007	0.005	0.019	0.017	0.008	0.006	0.001	0.004	0.007	0.016	0.004	0.021	0.014	0.006	0.005	0.009	0.044	0.009	0.002	0.011	0.006	0.07	0.012	0.018	0.017	0.015	0.02	0.02	0.009	0.006	0.011	0.004	0.01	0.015	0.01	0.003	0.042	0.013	0.013	0.005	0.017	0.006	0.007	0.006	0.005	0.009	0.006	0.008
Levant_BA	0.021	0.023	0.02	0.019	0.022	0.016	0.015	0.015	0.015	0.023	0.031	0.013	0.025	0.031	0.02	0.017	0.026	0.057	0.024	0.013	0.028	0.017	0.084	0.027	0.035	0.019	0.026	0.024	0.037	0.025	0.022	0.028	0.018	0.025	0.032	0.015	0.018	0.047	0.029	0.03	0.02	0.031	0.019	0.021	0.02	0.016	0.021	0.018	0.02
Levant_N	0.038	0.041	0.032	0.023	0.039	0.031	0.034	0.031	0.033	0.041	0.042	0.026	0.04	0.046	0.034	0.029	0.043	0.085	0.038	0.027	0.042	0.032	0.1	0.042	0.051	0.023	0.04	0.03	0.052	0.039	0.039	0.042	0.031	0.039	0.047	0.035	0.037	0.072	0.044	0.044	0.032	0.042	0.032	0.037	0.036	0.034	0.033	0.03	0.032
Lezgin	0.006	0.005	0.008	0.032	0.019	0.008	0.003	0.005	0.008	0.005	0.019	0.013	0.034	0.012	0.007	0.009	0.006	0.036	0.009	0.009	0.01	0.013	0.055	0.011	0.015	0.028	0.012	0.029	0.016	0.01	0.006	0.011	0.008	0.009	0.013	0.014	0.005	0.04	0.011	0.011	0.01	0.022	0.012	0.012	0.012	0.011	0.018	0.013	0.017
Lithuanian	0.02	0.017	0.009	0.035	0.029	0.024	0.016	0.019	0.023	0.016	0.014	0.025	0.046	0.001	0.007	0.01	0.018	0.059	0.005	0.019	0.003	0.024	0.046	0.006	0.002	0.029	0.007	0.023	0.007	0.006	0.021	0.004	0.01	0.004	0.007	0.032	0.019	0.063	0.007	0.007	0.011	0.028	0.017	0.025	0.025	0.025	0.026	0.02	0.025
Maltese	0.01	0.01	0.004	0.018	0.019	0.012	0.007	0.006	0.008	0.01	0.013	0.008	0.028	0.012	0.004	0.004	0.012	0.052	0.008	0.005	0.008	0.01	0.065	0.009	0.014	0.015	0.013	0.016	0.017	0.007	0.01	0.008	0.004	0.007	0.012	0.017	0.008	0.05	0.01	0.01	0.004	0.019	0.007	0.012	0.011	0.01	0.012	0.008	0.01
Mordovian	0.016	0.012	0.008	0.033	0.025	0.02	0.012	0.015	0.018	0.011	0.014	0.021	0.042	0.002	0.005	0.008	0.014	0.053	0.005	0.016	0.003	0.02	0.043	0.005	0.003	0.028	0.007	0.023	0.006	0.006	0.017	0.004	0.008	0.003	0.007	0.027	0.014	0.056	0.006	0.006	0.009	0.026	0.013	0.021	0.021	0.02	0.023	0.018	0.021
Natufian	0.091	0.092	0.085	0.079	0.084	0.088	0.089	0.085	0.085	0.091	0.097	0.073	0.083	0.097	0.087	0.078	0.096	0.142	0.09	0.079	0.095	0.084	0.146	0.094	0.1	0.08	0.091	0.088	0.1	0.091	0.094	0.092	0.084	0.092	0.099	0.09	0.089	0.113	0.096	0.096	0.087	0.096	0.085	0.09	0.085	0.084	0.082	0.08	0.083
North_Ossetian	0.004	0.004	0.008	0.029	0.02	0.009	0.006	0.005	0.008	0.002	0.019	0.013	0.034	0.013	0.008	0.01	0.006	0.036	0.011	0.009	0.011	0.013	0.06	0.012	0.015	0.027	0.014	0.026	0.016	0.011	0.005	0.011	0.008	0.01	0.014	0.015	0.006	0.042	0.012	0.012	0.01	0.022	0.011	0.012	0.013	0.011	0.017	0.013	0.016
Norwegian	0.016	0.013	0.006	0.029	0.025	0.02	0.012	0.014	0.017	0.013	0.01	0.02	0.041	0.004	0.005	0.004	0.014	0.056	0.003	0.014	0.002	0.019	0.046	0.002	0.005	0.023	0.005	0.018	0.007	0.002	0.016	0.002	0.007	0.003	0.003	0.028	0.015	0.061	0.002	0.002	0.006	0.023	0.013	0.02	0.021	0.02	0.02	0.016	0.02
Orcadian	0.016	0.013	0.007	0.029	0.026	0.021	0.013	0.015	0.018	0.013	0.011	0.02	0.041	0.006	0.006	0.006	0.014	0.054	0.006	0.014	0.004	0.02	0.049	0.003	0.007	0.024	0.006	0.019	0.009	0.004	0.017	0.004	0.008	0.004	0.005	0.029	0.015	0.061	0.003	0.003	0.007	0.024	0.013	0.02	0.021	0.02	0.021	0.016	0.02
Palestinian	0.011	0.012	0.009	0.022	0.021	0.013	0.011	0.006	0.008	0.012	0.02	0.005	0.022	0.019	0.01	0.008	0.014	0.05	0.014	0.006	0.016	0.009	0.073	0.016	0.023	0.02	0.02	0.023	0.024	0.014	0.011	0.016	0.008	0.014	0.02	0.015	0.007	0.046	0.018	0.018	0.01	0.021	0.01	0.011	0.01	0.008	0.012	0.009	0.011
Polish	0.014	0.011	0.004	0.028	0.024	0.019	0.011	0.013	0.016	0.011	0.01	0.018	0.039	0	0.002	0.005	0.012	0.053	0.002	0.012	0	0.018	0.045	0.002	0.002	0.022	0.005	0.018	0.005	0.002	0.015	0.001	0.005	0.001	0.004	0.026	0.013	0.06	0.002	0.003	0.005	0.022	0.011	0.019	0.019	0.018	0.019	0.015	0.019
Romanian	0.011	0.009	0.002	0.021	0.02	0.015	0.009	0.008	0.011	0.009	0.01	0.013	0.034	0.004	0.002	0.003	0.011	0.052	0.003	0.008	0.003	0.013	0.054	0.004	0.007	0.016	0.007	0.015	0.009	0.003	0.012	0.003	0.003	0.003	0.007	0.02	0.01	0.055	0.005	0.006	0.003	0.018	0.008	0.015	0.015	0.014	0.015	0.01	0.014
Russian	0.016	0.012	0.008	0.034	0.025	0.021	0.013	0.016	0.019	0.012	0.014	0.021	0.042	0.002	0.005	0.009	0.014	0.054	0.005	0.016	0.003	0.021	0.041	0.005	0.002	0.028	0.007	0.023	0.004	0.005	0.018	0.003	0.008	0.003	0.006	0.028	0.015	0.058	0.005	0.006	0.009	0.026	0.015	0.021	0.022	0.021	0.023	0.018	0.022
Sardinian	0.02	0.019	0.008	0.016	0.028	0.023	0.018	0.015	0.017	0.019	0.013	0.017	0.036	0.017	0.009	0.006	0.022	0.066	0.012	0.011	0.013	0.017	0.076	0.012	0.02	0.011	0.017	0.009	0.022	0.01	0.019	0.013	0.009	0.012	0.016	0.029	0.019	0.069	0.014	0.014	0.007	0.023	0.012	0.02	0.02	0.017	0.018	0.013	0.017
Saudi	0.017	0.018	0.014	0.026	0.027	0.017	0.016	0.011	0.012	0.018	0.026	0.007	0.013	0.026	0.016	0.015	0.02	0.056	0.02	0.01	0.023	0.013	0.081	0.022	0.029	0.025	0.026	0.028	0.031	0.02	0.017	0.023	0.014	0.02	0.026	0.02	0.013	0.053	0.024	0.025	0.016	0.027	0.015	0.016	0.014	0.011	0.016	0.013	0.015
Scottish	0.014	0.011	0.005	0.027	0.023	0.018	0.01	0.013	0.016	0.011	0.008	0.018	0.039	0.004	0.004	0.003	0.012	0.053	0.003	0.012	0.002	0.017	0.047	0.001	0.004	0.021	0.004	0.016	0.007	0.001	0.015	0.001	0.006	0.002	0.002	0.026	0.013	0.059	0	0	0.004	0.021	0.011	0.018	0.019	0.018	0.019	0.014	0.018
Shetlandic	0.016	0.013	0.007	0.028	0.024	0.02	0.012	0.014	0.017	0.013	0.01	0.019	0.041	0.005	0.005	0.005	0.014	0.053	0.004	0.013	0.002	0.019	0.047	0.002	0.005	0.023	0.005	0.018	0.008	0.002	0.017	0.002	0.007	0.003	0.003	0.027	0.015	0.06	0.002	0.001	0.005	0.023	0.012	0.02	0.021	0.02	0.021	0.015	0.02
SHG	0.089	0.081	0.075	0.099	0.088	0.088	0.078	0.088	0.092	0.081	0.072	0.091	0.113	0.06	0.069	0.069	0.084	0.123	0.066	0.088	0.061	0.093	0.051	0.063	0.058	0.091	0.055	0.076	0.059	0.064	0.09	0.062	0.075	0.062	0.062	0.097	0.085	0.121	0.063	0.061	0.073	0.094	0.082	0.093	0.095	0.095	0.092	0.087	0.092
Sicilian	0.008	0.008	0.002	0.016	0.018	0.011	0.007	0.004	0.007	0.008	0.011	0.008	0.027	0.009	0.002	0.002	0.01	0.05	0.004	0.003	0.006	0.008	0.063	0.006	0.012	0.012	0.01	0.013	0.014	0.005	0.008	0.006	0.002	0.005	0.01	0.015	0.006	0.051	0.008	0.008	0.002	0.016	0.006	0.01	0.01	0.008	0.01	0.006	0.009
Sorb	0.016	0.013	0.006	0.029	0.025	0.021	0.012	0.015	0.018	0.013	0.011	0.02	0.042	0.002	0.004	0.007	0.014	0.054	0.003	0.014	0.002	0.02	0.047	0.004	0.003	0.024	0.006	0.019	0.007	0.004	0.017	0.002	0.007	0.002	0.005	0.027	0.015	0.06	0.004	0.004	0.006	0.023	0.012	0.021	0.02	0.02	0.021	0.016	0.021
Spanish	0.012	0.011	0.003	0.018	0.021	0.015	0.01	0.009	0.012	0.01	0.005	0.012	0.032	0.006	0.002	0	0.012	0.054	0.004	0.007	0.003	0.013	0.057	0.003	0.008	0.013	0.006	0.009	0.01	0.001	0.012	0.003	0.003	0.003	0.005	0.022	0.011	0.058	0.004	0.003	0.001	0.018	0.007	0.015	0.015	0.013	0.013	0.009	0.012
Spanish_North	0.017	0.015	0.007	0.023	0.026	0.019	0.015	0.014	0.017	0.015	0.003	0.018	0.038	0.008	0.006	0.003	0.017	0.059	0.007	0.012	0.005	0.018	0.059	0.006	0.01	0.017	0.009	0.012	0.013	0.004	0.017	0.006	0.007	0.006	0.007	0.028	0.017	0.065	0.006	0.006	0.005	0.022	0.011	0.02	0.021	0.019	0.018	0.014	0.017
Steppe_EMBA	0.025	0.021	0.023	0.053	0.031	0.025	0.015	0.027	0.03	0.021	0.031	0.035	0.057	0.017	0.02	0.024	0.02	0.048	0.02	0.031	0.017	0.035	0.031	0.018	0.018	0.048	0.011	0.044	0.019	0.019	0.027	0.018	0.024	0.018	0.018	0.034	0.023	0.054	0.017	0.017	0.025	0.041	0.03	0.033	0.034	0.035	0.038	0.033	0.038
Steppe_Eneolithic	0.048	0.042	0.043	0.075	0.046	0.049	0.032	0.052	0.054	0.04	0.049	0.056	0.08	0.032	0.04	0.043	0.041	0.071	0.036	0.053	0.034	0.057	0.005	0.036	0.03	0.07	0.027	0.064	0.031	0.037	0.051	0.034	0.044	0.034	0.035	0.056	0.044	0.078	0.034	0.033	0.044	0.061	0.051	0.055	0.056	0.058	0.06	0.056	0.059
Steppe_MLBA	0.02	0.016	0.013	0.035	0.023	0.019	0.01	0.019	0.022	0.016	0.018	0.025	0.046	0.009	0.011	0.011	0.017	0.05	0.01	0.02	0.008	0.025	0.035	0.008	0.01	0.03	0.004	0.025	0.011	0.009	0.021	0.008	0.014	0.009	0.01	0.026	0.018	0.057	0.008	0.008	0.013	0.03	0.019	0.025	0.026	0.025	0.027	0.022	0.026
Syrian	0.008	0.009	0.007	0.022	0.019	0.009	0.006	0.003	0.005	0.009	0.019	0.004	0.021	0.016	0.008	0.007	0.01	0.046	0.012	0.004	0.013	0.007	0.069	0.014	0.019	0.02	0.017	0.022	0.022	0.012	0.009	0.013	0.006	0.012	0.017	0.011	0.004	0.042	0.016	0.015	0.008	0.02	0.008	0.009	0.008	0.006	0.011	0.007	0.009
Turkish	0.004	0.004	0.003	0.021	0.016	0.007	0.003	0.001	0.004	0.004	0.014	0.007	0.026	0.011	0.004	0.004	0.006	0.041	0.007	0.003	0.008	0.007	0.061	0.009	0.013	0.018	0.011	0.019	0.015	0.007	0.004	0.008	0.003	0.007	0.012	0.01	0.002	0.04	0.01	0.01	0.005	0.017	0.006	0.008	0.007	0.006	0.011	0.007	0.01
Ukrainian	0.013	0.011	0.005	0.028	0.023	0.018	0.01	0.012	0.016	0.011	0.011	0.018	0.039	0.001	0.002	0.005	0.012	0.052	0.002	0.013	0.001	0.018	0.045	0.003	0.002	0.023	0.005	0.019	0.006	0.003	0.014	0.001	0.006	0.001	0.004	0.025	0.013	0.056	0.004	0.005	0.005	0.023	0.011	0.018	0.019	0.018	0.02	0.015	0.019
WHG	0.091	0.084	0.071	0.097	0.092	0.09	0.082	0.088	0.091	0.082	0.064	0.089	0.11	0.056	0.067	0.062	0.085	0.126	0.063	0.087	0.058	0.091	0.08	0.06	0.055	0.085	0.056	0.061	0.058	0.06	0.091	0.057	0.073	0.06	0.059	0.099	0.087	0.126	0.06	0.06	0.069	0.092	0.079	0.093	0.094	0.094	0.09	0.084	0.089
Ami	0.128	0.122	0.13	0.155	0.141	0.133	0.126	0.129	0.131	0.117	0.142	0.126	0.148	0.131	0.129	0.128	0.125	0.156	0.132	0.132	0.131	0.134	0.158	0.134	0.131	0.152	0.132	0.148	0.125	0.132	0.132	0.133	0.131	0.129	0.135	0.133	0.119	0.146	0.133	0.133	0.133	0.145	0.131	0.134	0.133	0.133	0.136	0.132	0.136
Biaka	0.173	0.172	0.173	0.188	0.179	0.172	0.166	0.17	0.17	0.17	0.184	0.146	0.171	0.178	0.173	0.161	0.174	0.195	0.176	0.17	0.177	0.168	0.209	0.178	0.18	0.186	0.176	0.185	0.179	0.176	0.173	0.177	0.173	0.176	0.181	0.17	0.163	0.178	0.18	0.178	0.175	0.182	0.17	0.173	0.172	0.169	0.165	0.164	0.166
Nasoi	0.162	0.157	0.162	0.184	0.17	0.165	0.159	0.16	0.162	0.153	0.172	0.155	0.177	0.164	0.161	0.159	0.16	0.189	0.164	0.163	0.164	0.164	0.193	0.166	0.165	0.181	0.163	0.177	0.162	0.164	0.164	0.164	0.162	0.163	0.168	0.162	0.152	0.176	0.166	0.166	0.165	0.175	0.163	0.164	0.164	0.164	0.166	0.163	0.166
Chukchi	0.123	0.116	0.124	0.152	0.133	0.128	0.119	0.125	0.126	0.111	0.134	0.123	0.146	0.121	0.122	0.122	0.118	0.152	0.123	0.128	0.122	0.13	0.133	0.124	0.12	0.148	0.121	0.144	0.113	0.124	0.127	0.124	0.125	0.121	0.125	0.129	0.115	0.143	0.124	0.124	0.127	0.139	0.126	0.129	0.129	0.13	0.132	0.128	0.132
Eskimo	0.129	0.121	0.13	0.158	0.138	0.133	0.125	0.13	0.132	0.117	0.139	0.128	0.151	0.126	0.127	0.128	0.123	0.157	0.128	0.133	0.127	0.136	0.135	0.13	0.126	0.153	0.127	0.149	0.118	0.129	0.132	0.129	0.13	0.126	0.131	0.134	0.12	0.149	0.129	0.129	0.132	0.145	0.131	0.134	0.134	0.135	0.138	0.133	0.137
Han	0.106	0.099	0.108	0.133	0.119	0.111	0.104	0.106	0.108	0.094	0.118	0.104	0.126	0.107	0.106	0.105	0.102	0.136	0.109	0.109	0.108	0.111	0.135	0.111	0.108	0.129	0.109	0.126	0.101	0.109	0.109	0.11	0.108	0.106	0.112	0.111	0.096	0.123	0.11	0.11	0.11	0.122	0.108	0.11	0.11	0.11	0.113	0.109	0.113
Ju_hoan_North	0.218	0.217	0.218	0.231	0.223	0.216	0.211	0.215	0.215	0.215	0.228	0.193	0.217	0.223	0.218	0.208	0.219	0.238	0.221	0.215	0.222	0.214	0.251	0.223	0.225	0.23	0.221	0.228	0.224	0.22	0.219	0.222	0.218	0.22	0.225	0.215	0.209	0.223	0.224	0.222	0.22	0.226	0.216	0.219	0.217	0.215	0.211	0.21	0.212
Karitiana	0.209	0.202	0.21	0.237	0.216	0.213	0.204	0.21	0.212	0.198	0.219	0.208	0.231	0.205	0.207	0.206	0.203	0.238	0.208	0.213	0.206	0.215	0.208	0.209	0.206	0.233	0.205	0.229	0.2	0.208	0.212	0.208	0.21	0.205	0.209	0.213	0.2	0.228	0.208	0.207	0.212	0.224	0.212	0.214	0.214	0.215	0.217	0.213	0.217
Kharia	0.074	0.07	0.076	0.101	0.085	0.079	0.072	0.074	0.075	0.067	0.088	0.072	0.094	0.077	0.076	0.075	0.072	0.103	0.078	0.077	0.079	0.079	0.107	0.08	0.079	0.097	0.078	0.094	0.075	0.078	0.077	0.079	0.076	0.077	0.081	0.077	0.064	0.089	0.08	0.079	0.079	0.09	0.077	0.078	0.077	0.077	0.082	0.078	0.081
Mbuti	0.202	0.2	0.203	0.217	0.208	0.2	0.196	0.199	0.198	0.198	0.213	0.176	0.2	0.207	0.202	0.191	0.203	0.223	0.205	0.199	0.207	0.197	0.237	0.207	0.21	0.215	0.205	0.214	0.209	0.205	0.203	0.206	0.202	0.205	0.21	0.198	0.192	0.206	0.209	0.207	0.204	0.211	0.199	0.202	0.201	0.198	0.194	0.194	0.196
Onge	0.17	0.165	0.171	0.193	0.181	0.173	0.166	0.168	0.17	0.162	0.182	0.164	0.187	0.172	0.171	0.168	0.168	0.198	0.172	0.172	0.173	0.173	0.201	0.174	0.173	0.19	0.172	0.187	0.17	0.173	0.172	0.173	0.171	0.172	0.176	0.171	0.16	0.183	0.175	0.174	0.174	0.184	0.172	0.173	0.173	0.173	0.174	0.172	0.174
Papuan	0.189	0.184	0.188	0.21	0.197	0.191	0.185	0.186	0.188	0.181	0.198	0.18	0.202	0.19	0.187	0.185	0.187	0.214	0.19	0.19	0.191	0.189	0.22	0.191	0.191	0.206	0.189	0.202	0.189	0.19	0.19	0.19	0.189	0.189	0.194	0.189	0.178	0.2	0.192	0.191	0.191	0.202	0.189	0.19	0.19	0.19	0.191	0.189	0.191
She	0.114	0.108	0.116	0.142	0.127	0.119	0.112	0.115	0.116	0.102	0.127	0.112	0.134	0.116	0.115	0.114	0.111	0.145	0.117	0.117	0.117	0.12	0.145	0.12	0.117	0.138	0.118	0.134	0.11	0.117	0.118	0.119	0.117	0.115	0.121	0.119	0.105	0.131	0.119	0.118	0.119	0.13	0.116	0.119	0.119	0.12	0.122	0.118	0.121
Ulchi	0.113	0.106	0.115	0.141	0.125	0.119	0.111	0.115	0.116	0.101	0.125	0.112	0.135	0.114	0.114	0.113	0.109	0.144	0.115	0.117	0.115	0.12	0.137	0.117	0.114	0.137	0.115	0.133	0.106	0.116	0.117	0.116	0.116	0.113	0.118	0.119	0.105	0.13	0.117	0.116	0.118	0.13	0.116	0.119	0.118	0.119	0.122	0.118	0.121
Yoruba	0.146	0.145	0.147	0.162	0.154	0.145	0.14	0.143	0.143	0.143	0.157	0.118	0.144	0.151	0.146	0.134	0.147	0.169	0.15	0.142	0.151	0.141	0.183	0.151	0.154	0.16	0.15	0.159	0.153	0.149	0.147	0.151	0.146	0.149	0.154	0.143	0.136	0.153	0.153	0.152	0.148	0.155	0.143	0.146	0.144	0.142	0.137	0.137	0.138
[truncated: 52 more columns]
